# Supplementary material for: Highly dispersive CoSe2 nanoparticles encapsulated in carbon nanotube-grafted multichannel carbon fibers as advanced anodes for sodium-ion half/full batteries
Source: Royal Society of Chemistry journal article supplement (doi:10.1039/d2qi01453j), 2022-01-01
Supplement: d2qi01453j1.pdf [file d2qi01453j1.pdf]

# **Highly dispersive CoSe<sub>2</sub> nanoparticles encapsulated in carbon nanotube-grafted multichannel carbon fibers as advanced anodes for sodium-ion half/full batteries**

Yangyang Sui,<sup>a,b†</sup> Jia Guo,<sup>a,b†</sup> Xiaoyu Chen,<sup>c†</sup> Jinpeng Guan,<sup>a</sup> Xinhe Chen,<sup>a</sup> Huaixin

Wei,<sup>d</sup> Quan Liu,<sup>a\*</sup> Bo Wei,<sup>a\*</sup> Hongbo Geng<sup>a\*</sup>

<sup>a</sup>*School of Materials Engineering, Changshu Institute of Technology, Changshu, Jiangsu 215500, China*

<sup>b</sup>*College of Chemistry, Chemical Engineering and Materials Science, Soochow University, Suzhou, Jiangsu 215123, China*

<sup>c</sup>*Department of Applied Chemistry, State Key Laboratory of Tea Plant Biology and Utilization, Anhui Agricultural University, Anhui, China*

<sup>d</sup>*School of Chemistry and Life Sciences, Suzhou University of Science and Technology, Suzhou, Jiangsu 215009, China*

<sup>†</sup> These authors contributed equally.

E-mail address: [njutlq@163.com](mailto:njutlq@163.com); [weibo@cslg.edu.cn](mailto:weibo@cslg.edu.cn); [hbgeng@gdut.edu.cn](mailto:hbgeng@gdut.edu.cn)

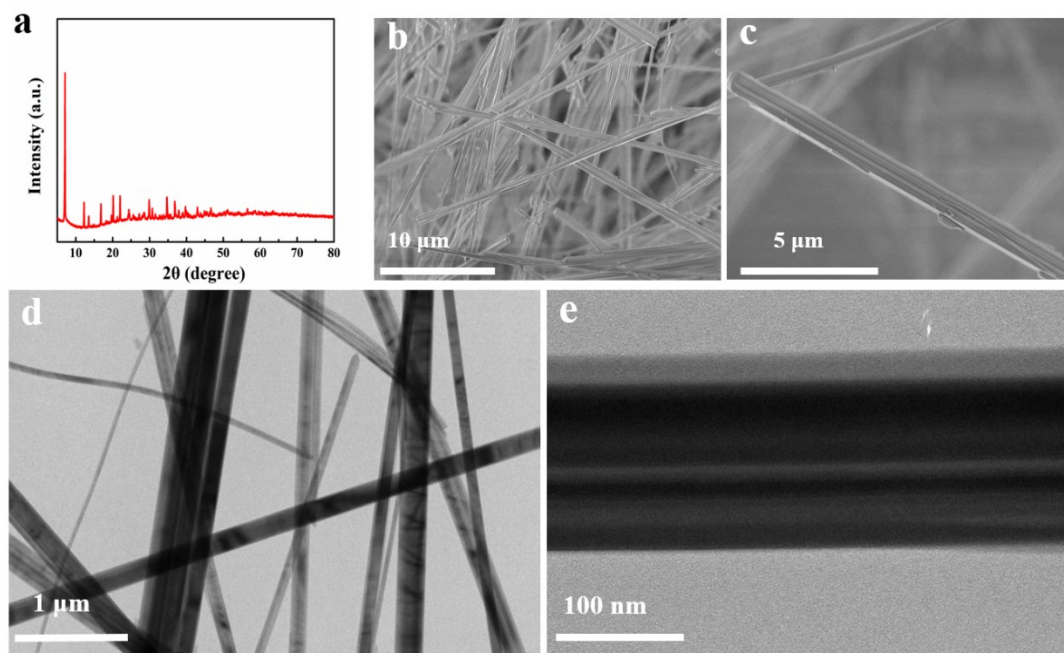

Fig. S1 Microstructure and morphology of cobalt coordination polymer nanowires. (a) XRD pattern; (b, c) SEM images; (d, e) TEM images.

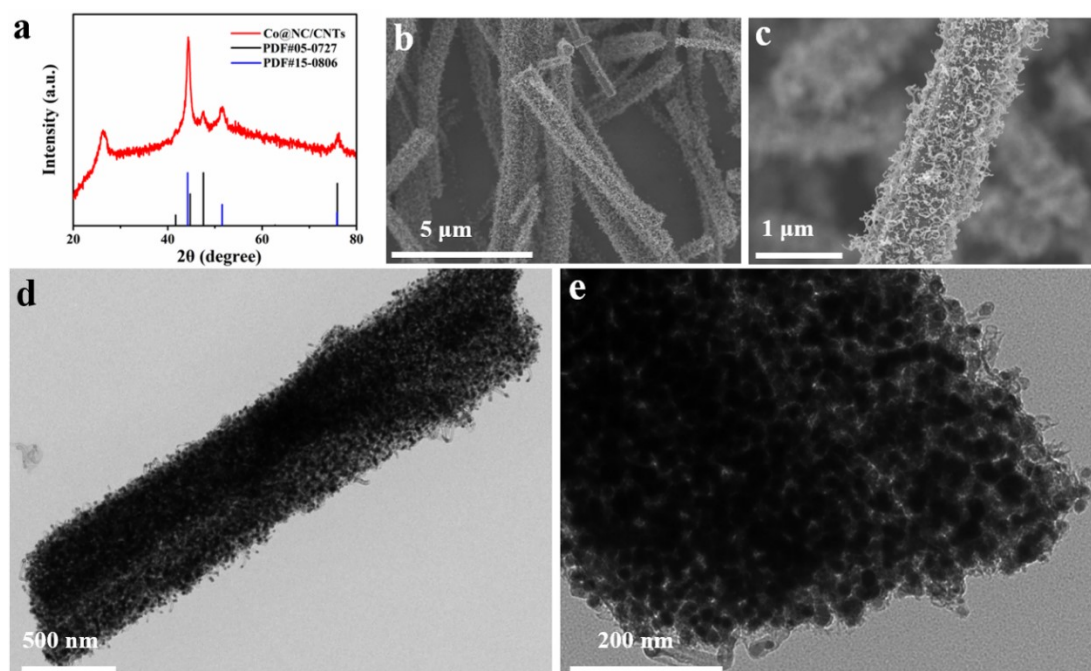

Fig. S2 Microstructure and morphology of Co@NC/CNTs. (a) XRD pattern; (b, c) SEM image; (d, e) TEM image.

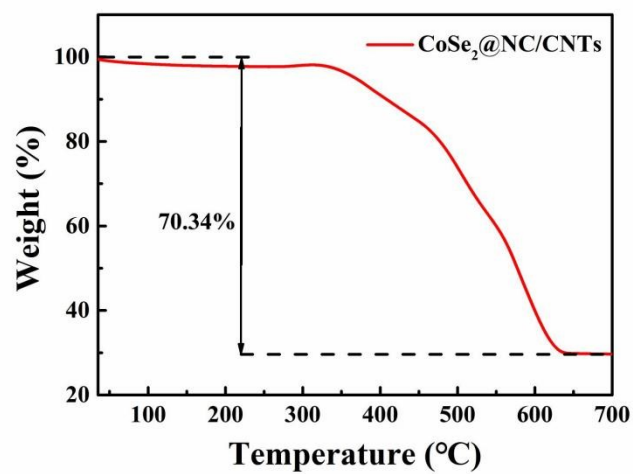

Fig. S3 TGA curve of CoSe<sub>2</sub>@NC/CNTs.

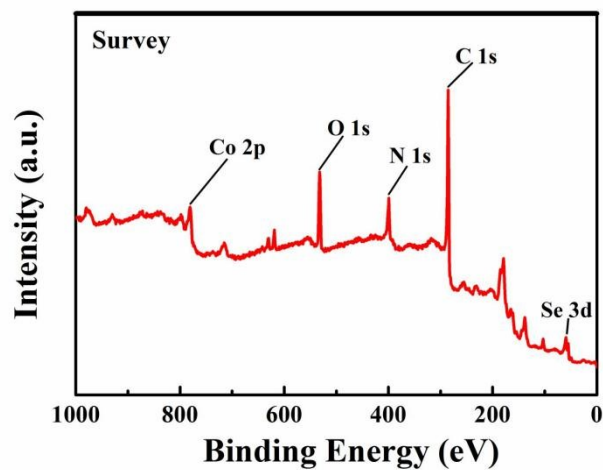

Fig. S4 XPS survey spectrum of CoSe<sub>2</sub>@NC/CNTs.

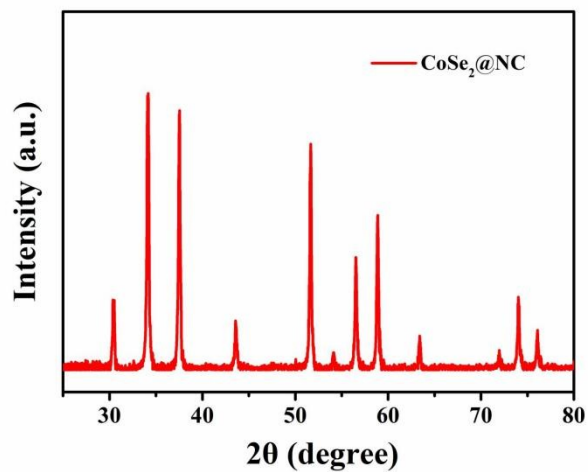

Fig. S5 XRD pattern of the CoSe<sub>2</sub>@NC.

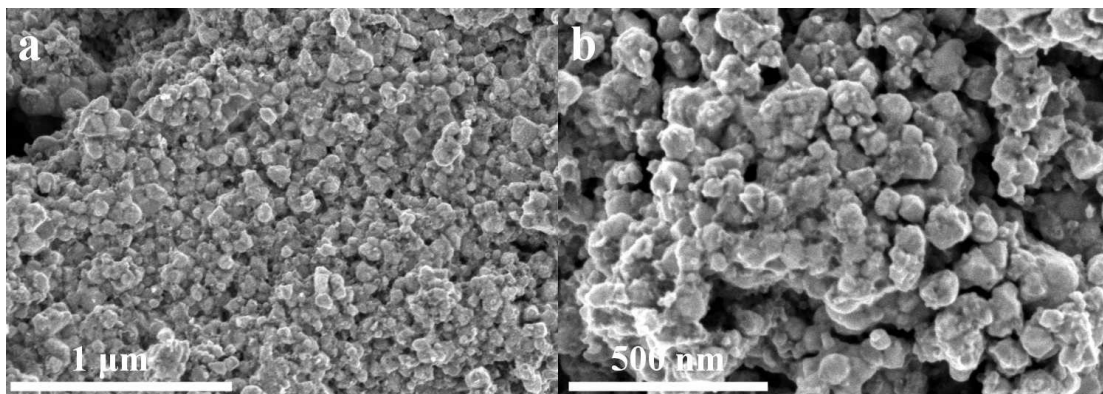

Fig. S6 SEM images of the CoSe<sub>2</sub>@NC.

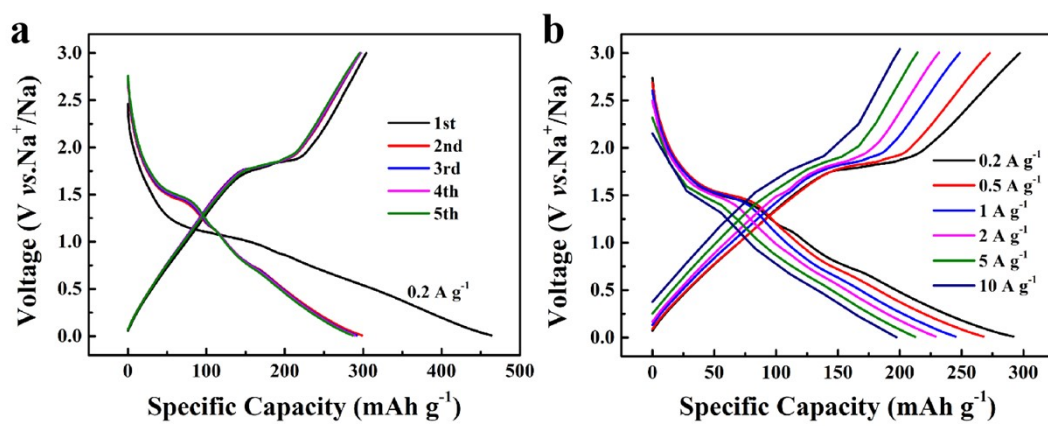

Fig. S7 (a) The GCD curves at 0.2 A g<sup>-1</sup> and (b) rate capacities at current densities of CoSe<sub>2</sub>@NC.

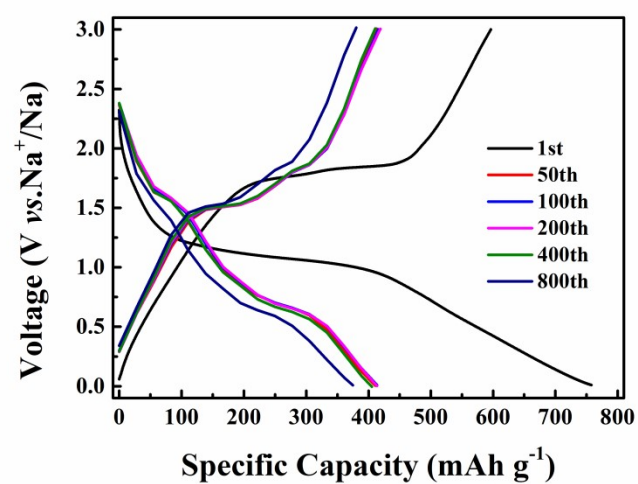

Fig. S8. The GCD curves at 10 A g<sup>-1</sup> of CoSe<sub>2</sub>@NC/CNTs.

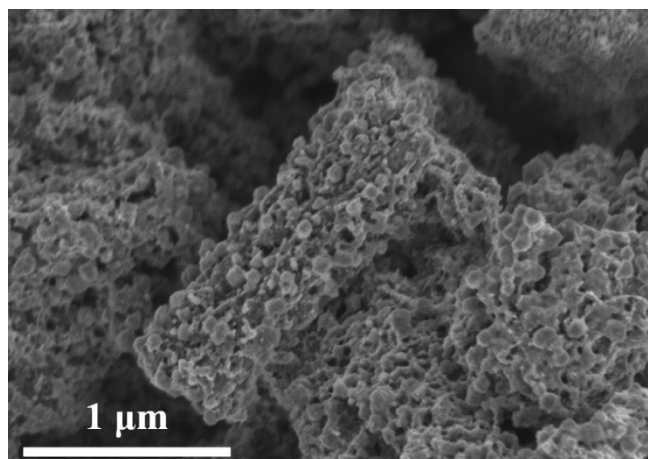

Fig. S9 SEM image of CoSe<sub>2</sub>@NC/CNTs after 50 cycles.

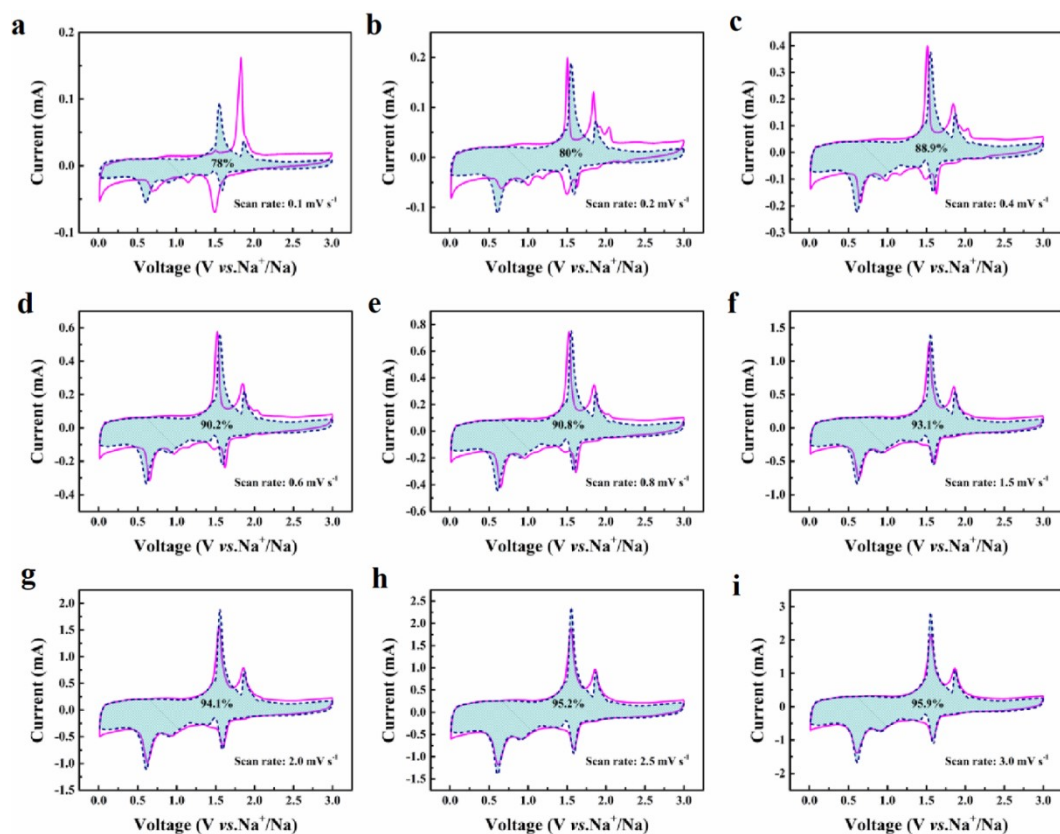

Fig. S10. Separation of the capacitive and diffusion-controlled current contribution at different scan rates.

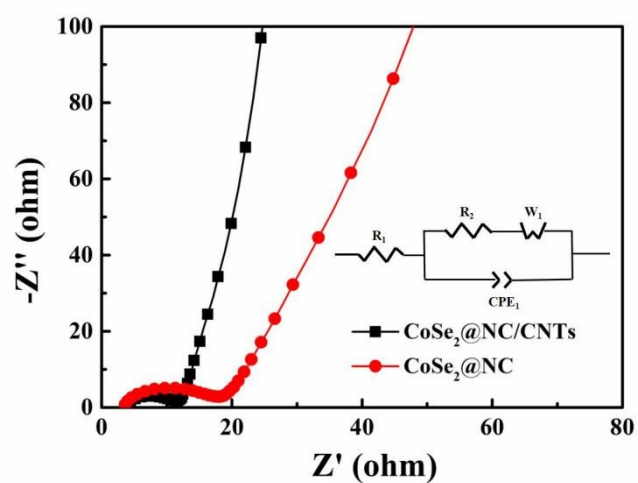

Fig. S11 EIS spectra of CoSe<sub>2</sub>@NC/CNTs and CoSe<sub>2</sub>@NC (Inset is the corresponding equivalent circuit).



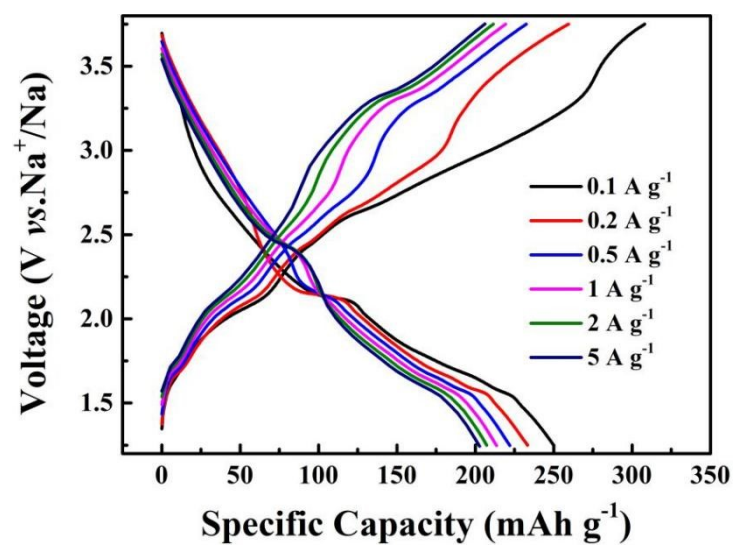

Fig. S12 GCD curves of CoSe<sub>2</sub>@NC/CNTs//NVPOF full cell at different current densities.
